# Supplementary material for: Lack of inflammatory gene expression in bats: a unique role for a transcription repressor
Source: PubMed Central journal article supplement (PMC5440382; doi:10.1038/s41598-017-01513-w), 2017-05-22
Supplement: 41598_2017_1513_MOESM1_ESM.pdf [file 41598_2017_1513_MOESM1_ESM.pdf]

1 **Supplemental Information**

2 **Title: Lack of inflammatory gene expression in bats: a unique role**  
3 **for a transcription repressor.**

4 **Authors:** Arinjay Banerjee<sup>a</sup>, Noreen Rapin<sup>a</sup>, Trent Bollinger<sup>b</sup> and Vikram Misra<sup>a#</sup>

5 **Affiliations:** <sup>a</sup> Department of Microbiology, Western College of Veterinary Medicine,  
6 University of Saskatchewan, Saskatoon, Saskatchewan, Canada, S7N 5B4.

7 <sup>b</sup> Department of Pathology, Western College of Veterinary Medicine, University of  
8 Saskatchewan, Saskatoon, Saskatchewan, Canada, S7N 5B4.

9

10

11

12

13

14

15

16

17

18

19

20 **Supplemental Figure S1**

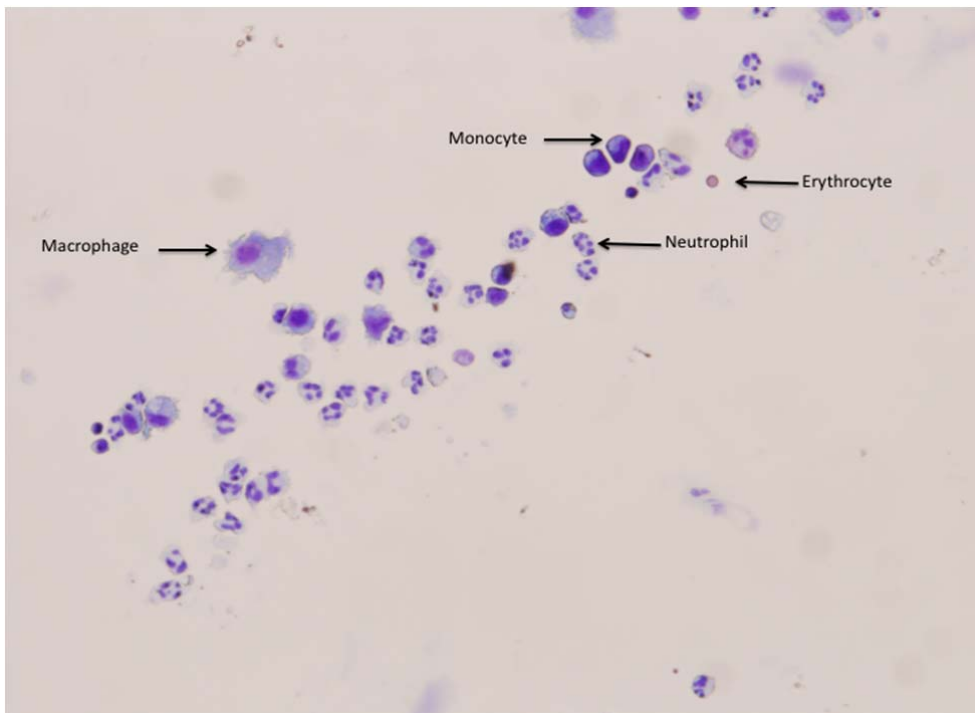

21

22 **Figure S1. Big brown bat bone marrow derived myeloid cells were a mixed**  
23 **population.** Bone marrow derived cells were deposited on a slide by centrifugation  
24 and differentially stained. Various populations of myeloid cells were observed. Cell  
25 types based on morphological features are labelled in the figure.

26

27

28

29

30

31

32 **Supplemental Figure S2**

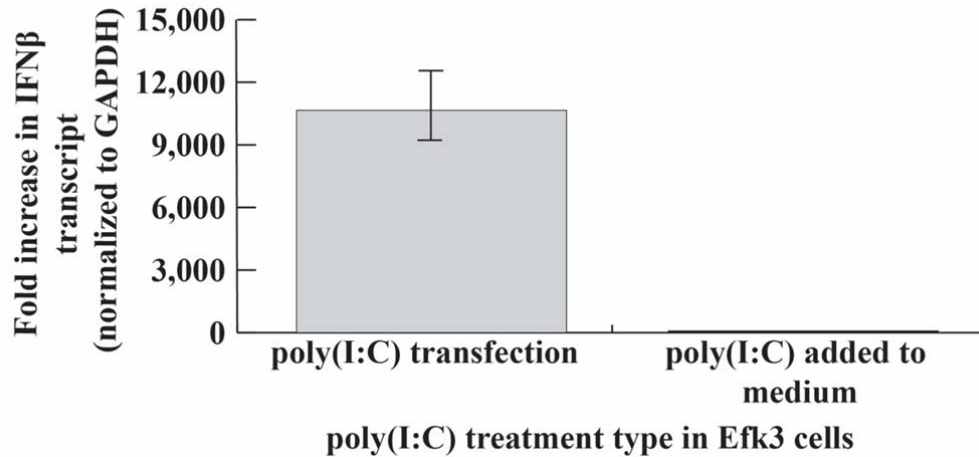

33

34 **Figure S2. Transfection of poly(I:C) is essential to activation of the TLR3**  
35 **pathway.** To determine if poly(I:C) is recognized by a cell surface receptor or an  
36 internal receptor, such as TLR3, in bat cells, we quantified IFN $\beta$  transcripts in Efk3  
37 cells after transfecting or adding poly(I:C) to culture medium. Adding poly(I:C) to the  
38 culture medium did not upregulate IFN $\beta$  transcripts in Efk3 cells, whereas  
39 transfecting poly(I:C) induced several thousand folds of IFN $\beta$  transcripts (Mean $\pm$ SD,  
40 n=4).

41

42

43

44

45

46

47

48 **Supplemental Figure S3**

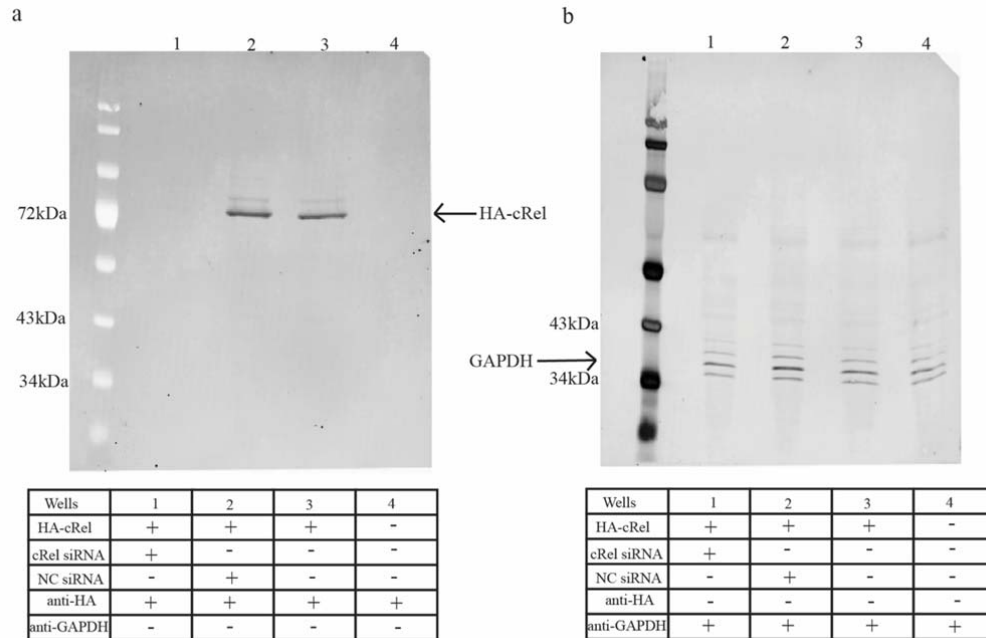

49

50 **Figure S3. c-Rel siRNA shuts down expression of HA-tagged c-Rel.** To study the  
51 knockdown potential of c-Rel siRNA at a protein level, we simultaneously transfected  
52 HEK293T cells with siRNA specific to c-Rel, non-specific scrambled siRNA (NC  
53 siRNA) or no siRNA and plasmids expressing HA-tagged c-Rel. (a) siRNA specific  
54 to c-Rel completely shuts down the expression of HA-c-Rel from the plasmid. In  
55 contrast, cells transfected with NC siRNA or no siRNA express HA-c-Rel. (b) There  
56 was no change in GAPDH expression between different treatments. NC = Negative  
57 control.

58

59

60

61

62 **Supplemental Figure S4**

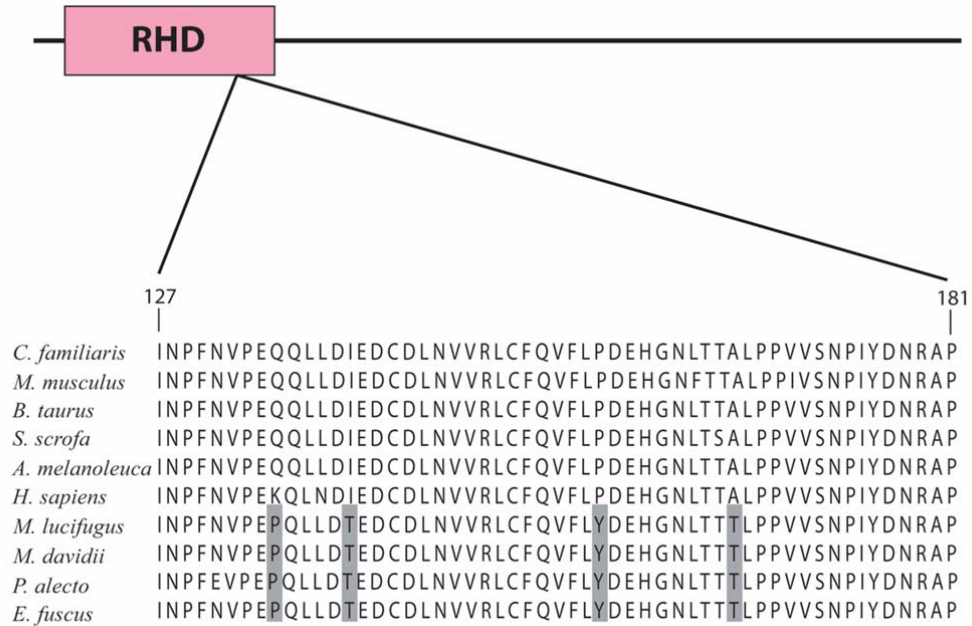

63

64 **Figure S4. Mutations in the c-Rel Rel homology domain (RHD).** Zhang *et al.* show

65 that 4 mutations specific to bat c-Rel exist in the downstream region of the RHD <sup>1</sup>.

66 IκB binding domain is located in the downstream region of the RHD and Zhang *et al.*

67 propose mutations in this region can affect IκB binding. Differences in amino acids

68 between bat RHD domains and those of other representative mammals are

69 highlighted.

70

71

72

73

74

75

76

77

78

79 **Supplemental Figure S5**

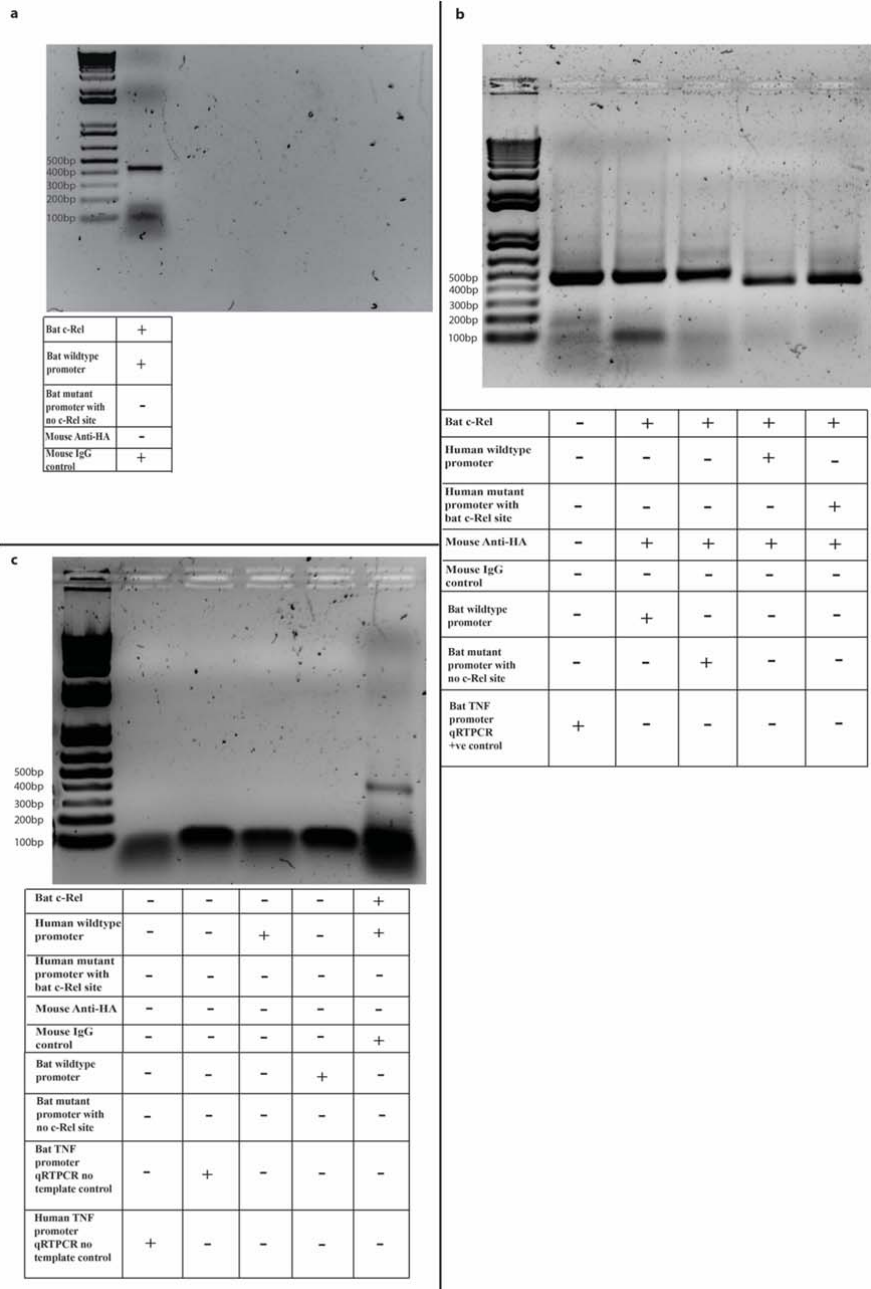

80

81 **Figure S5. qRT-PCR products from ChIP assay were electrophoresed on**  
 82 **separate gels. Images for figure 8 in the article file are shown above. Cropped images**

83 were acquired from these images and scaled to fit under the qRT-PCR data in Fig. 8.

84 ChIP and qRT-PCR controls are shown too.

85 **Supplemental Table S1.** PRR transcripts detected in human (MRC5) and bat (Efk3)

86 cells by PCR.

| <b>PRR type</b> | <b>MRC5</b> | <b>Efk3</b> |
|-----------------|-------------|-------------|
| <b>TLR2</b>     | +           | +           |
| <b>TLR3</b>     | +           | +           |
| <b>TLR7</b>     | +           | +           |
| <b>TLR8</b>     | +           | +           |
| <b>TLR9</b>     | +           | +           |
| <b>RIG-I</b>    | +           | +           |
| <b>MDA5</b>     | +           | +           |

87

88 **Supplemental Table S2.** Fold changes observed for innate immune gene transcripts

89 in MRC5 and Efk3 cells after different TLR ligand treatments. We transfected human

90 fibroblasts and bat kidney (Efk3) cells with poly(I:C), a known TLR3 stimulant, and

91 studied the expression of genes involved in the TLR3 pathway, relative to mock

92 transfected cells. Experiments were carried out in replicates (n=3). Standard deviation

93 values are reported along with mean fold changes.

| <b>TLR<br/>R<br/>liga</b> | <b>poly<br/>(I:C)</b> |  |  |  | <b>ssRN<br/>A 40</b> |  |  |  | <b>CpG<br/>ODN</b> |  |  |  |
|---------------------------|-----------------------|--|--|--|----------------------|--|--|--|--------------------|--|--|--|
|---------------------------|-----------------------|--|--|--|----------------------|--|--|--|--------------------|--|--|--|

| nd                             |                                     |                                 |                                     |                                 |                                     |                                 |                                     |                                 |                                     |                                 |                                     |                                 |
|--------------------------------|-------------------------------------|---------------------------------|-------------------------------------|---------------------------------|-------------------------------------|---------------------------------|-------------------------------------|---------------------------------|-------------------------------------|---------------------------------|-------------------------------------|---------------------------------|
| Gene                           | Mean fold upregulation - MRC5 cells | Standard deviation - MRC5 cells | Mean fold upregulation - Efk3 cells | Standard deviation - Efk3 cells | Mean fold upregulation - MRC5 cells | Standard deviation - MRC5 cells | Mean fold upregulation - Efk3 cells | Standard deviation - Efk3 cells | Mean fold upregulation - MRC5 cells | Standard deviation - MRC5 cells | Mean fold upregulation - Efk3 cells | Standard deviation - Efk3 cells |
| <b>IRF3</b>                    | 1.47                                | 0.15                            | 1.02                                | 2.03                            | 1.43                                | 0.58                            | -1.09                               | 0.44                            | 0.53                                | 1.42                            | 0.17                                | 0.05                            |
| <b>STAT1</b>                   | 7.91                                | 2.32                            | 6.09                                | 1.65                            | -1.66                               | 0.37                            | -1.05                               | 0.33                            | 4.3                                 | 1.11                            | -1.35                               | 0.09                            |
| <b>STAT2</b>                   | 3.5                                 | 0.45                            | 4.9                                 | 1.8                             | 1.14                                | 0.07                            | 1.25                                | 0.29                            | 1.74                                | 0.34                            | 1.195                               | 1.74                            |
| <b>MDA5</b>                    | 58.97                               | 14.54                           | 50.21                               | 18.8                            | -1                                  | 0.09                            | 1.2                                 | 0.21                            | 6.43                                | 0.133                           | -1.35                               | 0.33                            |
| <b>IL12A</b>                   | 3.2                                 | 0.58                            | 3.11                                | 0.7                             | -1.2                                | 0.152                           | 1.31                                | 0.49                            | 1.53                                | 0.32                            | 1.995                               | 0.03                            |
| <b>IL12B</b>                   | 3.59                                | 1.85                            | 2.77                                | 3.6                             | 5.13                                | 0.99                            | -2.14                               | 1.26                            | -0.95                               | 1.99                            | 0.36                                | 1.97                            |
| <b>GBP1</b>                    | 17.13                               | 1.87                            | 32                                  | 3.33                            | -1.86                               | 0.65                            | 2.46                                | 2.1                             | 2.14                                | 0.21                            | -1.43                               | 0.28                            |
| <b>TLR8</b>                    | 0.22                                | 1.48                            | -1.11                               | 0.38                            | -1.2                                | 0.095                           | -1.08                               | 0.5                             | -0.5                                | 1.46                            | 1.25                                | 0.08                            |
| <b>TLR7</b>                    | -0.28                               | 2.72                            | -1.11                               | 1.54                            | 1.42                                | 0.59                            | 2.36                                | 0.99                            | 1.23                                | 0.375                           | 1.22                                | 1.85                            |
| <b>IRF7</b>                    | 50.17                               | 17.1                            | 80.1                                | 21.03                           | 2.24                                | 1.78                            | -1.01                               | 0.24                            | 6.72                                | 0.71                            | 0.615                               | 0.19                            |
| <b>IFN<math>\beta</math></b>   | <b>15511</b>                        | <b>10160</b>                    | <b>10594.5</b>                      | <b>2207.8</b>                   | 8.3                                 | 1.29                            | 3.01                                | 0.38                            | 35.4                                | 9.84                            | 5.65                                | 3.15                            |
| <b>NF<math>\kappa</math>B1</b> | 3.85                                | 0.74                            | -1.23                               | 0.28                            | 2.66                                | 1.08                            | 1.41                                | 0.38                            | 1.35                                | 0.34                            | 2.035                               | 0.268                           |
| <b>TLR9</b>                    | 1.78                                | 0.468                           | -1.38                               | 0.31                            | -1.22                               | 0.11                            | -1.14                               | 0.75                            | -0.43                               | 1.72                            | -1.18                               | 0.05                            |
| <b>TNF<math>\alpha</math></b>  | <b>315.16</b>                       | <b>208.4</b>                    | <b>2.4</b>                          | <b>0.09</b>                     | 3.37                                | 2.01                            | 2.8                                 | 1.1                             | 20.52                               | 23.66                           | 3.085                               | 0.127                           |
| <b>IFI6</b>                    | 84.58                               | 33.08                           | 43.26                               | 20.95                           | 4.7                                 | 0.45                            | 1.07                                | 0.22                            | 15.99                               | 9.58                            | 2.885                               | 1.56                            |
| <b>IFI27</b>                   | 790.16                              | 88.9                            | 2.9                                 | 0.7                             | 3.53                                | 0.98                            | -1.07                               | 0.36                            | 34.93                               | 5.91                            | 1.23                                | 1.44                            |
| <b>IRF1</b>                    | 6                                   | 0.06                            | 2.99                                | 0.71                            | 1.65                                | 0.74                            | 1.21                                | 0.69                            | 1.71                                | 0.39                            | 3.18                                | 0.9                             |



|               |              |               |              |             |       |       |       |      |       |      |        |      |
|---------------|--------------|---------------|--------------|-------------|-------|-------|-------|------|-------|------|--------|------|
| <b>ISG 20</b> | 310.35       | 30.33         | 0.255        | 2.04        | -1.08 | 0.036 | -1.04 | 0.55 | 4.38  | 0.82 | -1.12  | 0.4  |
| <b>OAS1</b>   | 2949         | 2062.14       | 229.93       | 187.4       | 9.46  | 1.15  | 1.98  | 1.05 | 81.41 | 7.31 | 1.77   | 0.32 |
| <b>RSAD2</b>  | 3637.4       | 3121.22       | 49.65        | 35.92       | 3.64  | 0.72  | 1.26  | 1.28 | 66.37 | 7.59 | 1.65   | 0.09 |
| <b>RIIGI</b>  | 86.34        | 17.71         | 5.92         | 0.1         | 2.51  | 1.55  | 1.51  | 0.41 | 7.36  | 2    | -1.1   | 0.4  |
| <b>IL18</b>   | 1.29         | 0.1           | -1.9         | 0.7         | -3.1  | 1.6   | 1.18  | 0.76 | -0.45 | 1.28 | -1.41  | 0.09 |
| <b>IL8</b>    | <b>565</b>   | <b>100.26</b> | <b>-1.49</b> | <b>0.36</b> | 2.89  | 1.11  | 1.84  | 0.19 | 27.25 | 8.07 | 1.39   | 0.36 |
| <b>IL1β</b>   | <b>112.3</b> | <b>14.31</b>  | <b>3.16</b>  | <b>2.95</b> | 2.31  | 0.95  | 16.29 | 3.6  | 8.42  | 3.8  | 0.08   | 0.06 |
| <b>MX1</b>    | 632.33       | 200.61        | 44.32        | 4.24        | 0.38  | 2.55  | 1.79  | 0.44 | 37.45 | 6.53 | -1.65  | 7    |
| <b>TLR3</b>   | 15.26        | 6.8           | 4.37         | 0.74        | 0.57  | 1.53  | 1.84  | 1.1  | 2.72  | 0.27 | -1.065 | 0.04 |

94

95 **Supplemental Table S3.** c-Rel transcripts were detected in several big brown bat  
96 tissues by PCR.

| <b>Big brown bat organ</b> | <b>c-Rel transcript</b> |
|----------------------------|-------------------------|
| Spleen                     | +                       |
| Gut                        | +                       |
| Ileum                      | +                       |
| Kidney                     | +                       |
| Lung                       | +                       |
| Liver                      | +                       |

|                |   |
|----------------|---|
| Efk3 cell line | + |
|----------------|---|

97

98 **Supplemental Table S4.** Accession numbers, primer sequences and annealing  
99 temperatures for human and big brown bat genes and primers.

| Gene                                  | NCBI<br>Accession<br>- Human | NCBI<br>accession<br><i>E. fuscus</i> | Primers - human (forward<br>and reverse)                    | Annealin<br>g<br>temperat<br>ure | Primers- <i>E. fuscus</i> (forward<br>and reverse)          | Annealin<br>g<br>temperat<br>ure |
|---------------------------------------|------------------------------|---------------------------------------|-------------------------------------------------------------|----------------------------------|-------------------------------------------------------------|----------------------------------|
| <b>IFN<math>\beta</math></b>          | NM_0021<br>76.3              | XM_0081<br>45044.1                    | GCTTGGATTCTACAAA<br>GAAGCA ;<br>ATAGATGGTCAATGCGG<br>CGTC   | 54                               | GCTCCGATTCCGACAGAG<br>AAGCA ;<br>ATGCATGACCACCATGGC<br>TTC  | 56                               |
| <b>NF<math>\kappa</math>B -<br/>1</b> | NM_0039<br>98.3              | XM_0081<br>56644.1                    | GAAGCACGAATGACAGA<br>GGC ;<br>GCTTGGCGGATTAGCTCT<br>TTT     | 54                               | GAAGCACGGATGACAGAT<br>GC ;<br>GCCTGGCGGATGATCTCCT<br>TT     | 56                               |
| <b>IL12A</b>                          | NM_0008<br>82.3              | XM_0081<br>42364.1                    | CCTTGCACTTCTGAAGAG<br>ATTGA ;<br>ACAGGGCCATCATAAAA<br>GAGGT | 53                               | TCCTGCACTTCTGAAGAG<br>ATTGA ;<br>ACAGGGTCGTCATAAAAG<br>AGGC | 52                               |
| <b>IL12B</b>                          | NM_0021<br>87.2              | XM_0081<br>47661.1                    | ACCCTGACCATCCAAGT<br>CAA ;<br>TTGGCCTCGCATCTTAGA<br>AAG     | 55                               | ACCTTGACCATCCAAGTC<br>AAA ;<br>TTTGCTTCACATTTAGAA<br>AG     | 52                               |
| <b>IRF3</b>                           | NM_0015<br>71.5              | XM_0081<br>54348.1                    | AGAGGCTCGTGATGGTC<br>AAG ;<br>AGGTCCACAGTATTCTCC<br>AGG     | 55                               | AGAAGCTAGTGATGGTCA<br>AG ;<br>AGGTCCACAGTGTCTCCA<br>GC      | 56                               |
| <b>IL18</b>                           | NM_0015<br>62.3              | XM_0081<br>50175.1                    | TCTTCATTGACCAAGGA<br>AATCGG ;<br>TCCGGGGTGCATTATCTC         | 51                               | TCTTCGTTAACCAGGGAA<br>GCCAA ;<br>TCTGGGGTGCATTCTCTC         | 52                               |

|                               |                 |                    | TAC                                                          |    | AC                                                           |    |
|-------------------------------|-----------------|--------------------|--------------------------------------------------------------|----|--------------------------------------------------------------|----|
| <b>IRF7</b>                   | NM_0015<br>72.3 | XM_0081<br>59582.1 | CCCACGCTATACCATCTA<br>CCT ;<br>GATGTCGTCATAGAGGC<br>TGTTG    | 57 | CCCGCACTGCACCATCTAC<br>CT ;<br>CAGGTCCTCGTACAGGCT<br>GTTG    | 56 |
| <b>STAT1</b>                  | NM_0073<br>15.3 | XM_0081<br>46505.1 | CAGCTTGACTCAAAATTC<br>CTGGA ;<br>TGAAGATTACGCTTGCTT<br>TTCCT | 54 | CAGCTGGACGCCAAGTTC<br>CTGGA ;<br>TGCAGGTTGCGCTTGCTCT<br>TCCT | 56 |
| <b>STAT2</b>                  | NM_0054<br>19.3 | XM_0081<br>48645.1 | GAGCCAGCAACATGAGA<br>TTGA ;<br>GCCTGGATCTTATATCGG<br>AAGCA   | 53 | GAGCCAGCAGCATGAGAT<br>CGA ;<br>GCCTGAGTCTTGTATCGGA<br>AGAG   | 56 |
| <b>TLR3</b>                   | NM_0032<br>65.2 | XM_0081<br>51907.1 | TCAACTCAGAAGATTAC<br>CAGCCG ;<br>AGTTCAGTCAAATTCGTG<br>CAGAA | 53 | TCAGCTCAGAAAATTACC<br>GCCTG ;<br>AGTTCAGTCAAATTCGCG<br>CAGAA | 52 |
| <b>TLR7</b>                   | NM_0165<br>62.3 | XM_0081<br>56577.1 | TCGTGGACTGCACAGAC<br>AAG ;<br>GGTATGTGGTTAATGGT<br>GAGGGT    | 51 | TTGTGGACTGCACGGACA<br>AG ;<br>GGTATGTGGTTGATGGTG<br>AGGGT    | 52 |
| <b>TLR8</b>                   | NM_1386<br>36.5 | XM_0081<br>56576.1 | GACTACAGGAAGTTCCC<br>CAAAC ;<br>ATACCGGGATTTCGTTT<br>TGG     | 51 | GGCTGCAAGAAGTCCCC<br>AAAC ;<br>TTGCAATAATTCTCACAGT<br>AG     | 52 |
| <b>TLR9</b>                   | NM_0174<br>42.3 | XM_0081<br>55066.1 | CTGCCACATGACCATCG<br>AG ;<br>GGACAGGGATATGAGGG<br>ATTTGG     | 55 | CTGCCACATGACCATCGA<br>G ;<br>GGCCAGGGTCCGGAGGGC<br>GGGGG     | 56 |
| <b>TNF<math>\alpha</math></b> | NM_0005<br>94.3 | XM_0081<br>57360.1 | CAGCCTCTTCTCCTTCT<br>GA ;<br>AGATGATCTGACTGCCT<br>GGG        | 57 | GCCCATGTTGTAGCAAAC<br>C ;<br>GCCCTTGAAGAGGACCTG<br>GG        | 56 |
| <b>IL8</b>                    | NM_0005         | XM_0144            | ACTGAGAGTGATTGAGA                                            | 51 | AAACATGACTTCCAAGCT                                           | 52 |

|              |                    |                    |                                                            |    |                                                           |    |
|--------------|--------------------|--------------------|------------------------------------------------------------|----|-----------------------------------------------------------|----|
|              | 84.3               | 60599.1            | GTGGAC ;<br>AACCCCTCTGCACCCAGTT<br>TTC                     |    | GG ;<br>TGTGGTCCACTCTCAATCA<br>C                          |    |
| <b>IL1β</b>  | NM_0005<br>76.2    | XM_0081<br>60259.1 | ATGATGGCTTATTACAGT<br>GGCAA ;<br>GTCGGAGATTCGTAGCT<br>GGA  | 54 | ATGATGGCTTACTACAGT<br>GACAA ;<br>GTCGGAGATTTTCAGCTG<br>GA | 52 |
| <b>GBP1</b>  | NM_0020<br>53.2    | XM_0081<br>57793.1 | AGGAGTTCCTTCAAAGA<br>TGTGGA ;<br>GCAACTGGACCCTGTCG<br>TT   | 54 | TTCAGCTGACTTTGTGAGC<br>T ;<br>ACTGCTGATGGCATTAAAC<br>AT   | 52 |
| <b>IF16</b>  | NM_0020<br>38.3    | XM_0081<br>48008.1 | GGTCTGCGATCCTGAAT<br>GGG ;<br>TCACTATCGAGATACTTG<br>TGGGT  | 57 | GGTCGGCCATAGCGAACG<br>GG ;<br>TTGTTGTCTATCTGCCTGT<br>GGAC | 56 |
| <b>IF127</b> | NM_2069<br>49.2    | XM_0081<br>59947.1 | TGCTCTCACCTCATCAGC<br>AGT ;<br>CACAACCTCCTCCAATCAC<br>AACT | 56 | GCCAAGATGATGTCATCA<br>GC ;<br>CACATCCAGGCCCAATA<br>G      | 56 |
| <b>IRF1</b>  | NM_0021<br>98.2    | XM_0081<br>42488.1 | ATGCCATCACTCGGAT<br>GC ;<br>CCCTGCTTTGTATCGGCC<br>TG       | 56 | ATGCCATCACTCGGATG<br>C ;<br>CCCGACTTTGTACCGGCT<br>G       | 56 |
| <b>ISG20</b> | NM_0022<br>01.5    | XM_0081<br>55878.1 | TCTACGACACGTCCACTG<br>ACA ;<br>CTGTTCTGGATGCTCTTG<br>TGC   | 56 | CCCGAGACACCTCCATA<br>TTC ;<br>CCAGCCTGGATGTCCCGG<br>TTC   | 56 |
| <b>MX1</b>   | NM_0011<br>44925.2 | XM_0081<br>45691.1 | AGGACTACGAGATTGAG<br>AT ;<br>TTATGCCAGGAAGGTCT<br>A        | 51 | GGACATGGAGATCAATCT<br>T ;<br>TGATGCCAGGAAGGTCTA           | 52 |
| <b>OAS1</b>  | NM_0168<br>16.3    | XM_0081<br>42919.1 | AGTTGACTGGCGGCTAT<br>AAAC ;<br>GTGCTTGACTAGGCGGA           | 55 | AGGTGACGGACGACTACA<br>GAC ;<br>GTGCTTGACCAGGCGGAT         | 56 |

|                                   |                    |                    | TGAG                                                       |    | GAG                                                         |    |
|-----------------------------------|--------------------|--------------------|------------------------------------------------------------|----|-------------------------------------------------------------|----|
| <b>RSAD2</b>                      | NM_0806<br>57.4    | XM_0081<br>62430.1 | TGGGTGCTTACACCTGCT<br>G ;<br>GAAGTGATAGTTGACGC<br>TGGTT    | 53 | CGAGTACCTGGGCCGCCT<br>G ;<br>GAAGCGGTTGATGACGGA<br>GTTG     | 56 |
| <b>RIG-I</b>                      | NM_0143<br>14.3    | XM_0081<br>42005.1 | CTGGACCCTACCTACATC<br>CTG ;<br>GGCATCCAAAAAGCCAC<br>GG     | 55 | CTGGACCCACCTACGTCC<br>TC ;<br>AGCATCCAAAAAGCCACG<br>A       | 56 |
| <b>MDA5</b>                       | NM_0221<br>68.3    | XM_0081<br>38631.1 | GCCCGCTACATGAACCC<br>TG ;<br>CAGCAATCCGGTTTCTGT<br>CTT     | 55 | GCCCGCTACATGGACCCC<br>G ;<br>CAGAAACCCGACTTCTGT<br>CTT      | 56 |
| <b>GAPDH</b>                      | NM_0020<br>46.5    | XM_0081<br>44826.1 | GGAGCGAGATCCCTCCA<br>AAAT ;<br>GGCTGTTGTCATACTTCT<br>CATGG | 57 | GGAGCGAGATCCCGCAA<br>CAT ;<br>GGGAGTTGTCATACTTGTC<br>ATGG   | 56 |
| <b>β-actin</b>                    | NM_0010<br>17992.3 | XM_0081<br>56007.1 | CTCGACACCAGGGCGTT<br>ATG ;<br>CCACTCCATGCTCGATAG<br>GAT    | 57 | CCCGGCACCAGGGCGTGA<br>TG ;<br>CGATGCCGTGCTCGATGG<br>GGT     | 56 |
| <b>TLR2</b>                       | NM_0032<br>64.4    | XM_0081<br>44148.1 | TTATCCAGCACAGAAT<br>ACACAG ;<br>AGGCATCTGGTAGAGTC<br>ATCAA | 52 | TTATCCAATACAAGAATA<br>CAGAG ;<br>AGGCATCTGGTAGAGTCT<br>TCAA | 51 |
| <b>c-Rel</b>                      | -                  | XM_0081<br>62099.1 | -                                                          |    | GACGACTACTCTACCTCCT<br>G ;<br>ATCTTCACCGTCACTGGCT<br>C      | 56 |
| <b>β2-<br/>microgl<br/>obulin</b> | NM_0040<br>48.2    | -                  | GAGGCTATCCAGCGTAC<br>TCCA ;<br>CGGCAGGCATACTCATC<br>TTTT   | 55 | -                                                           |    |

101

102 **Supplemental Table S5.** siRNA sequences designed against *E. fuscus* (big brown

103 bat) TLR3, RIGI and MDA5. r = ribose sugar; BBB = big brown bat.

| siRNA sequence           | Duplex name           | siRNA duplex sequences                                              | Binding position on transcript       |
|--------------------------|-----------------------|---------------------------------------------------------------------|--------------------------------------|
| BBB TLR3 siRNA sequence  | CD.Ri.2628<br>2.13.2  | 5'<br>rCrUrArUrCrUrCrArArCrUrUrCrUrGrAr<br>CrArArArArCCT 3'         | BBB TLR3 -<br>position 337-362       |
| BBB TLR3 siRNA sequence2 |                       | 5'<br>rArGrGrUrUrUrGrUrCrArGrArArGrUr<br>UrGrArGrArUrArGrCrU 3'     |                                      |
| BBB TLR3 siRNA sequence  | CD.Ri.2628<br>2.13.1  | 5'<br>rCrArArCrArUrGrArGrArUrArCrCrUrGrAr<br>ArUrUrUrArAGA 3'       | BBB TLR3 -<br>position 972-997       |
| BBB TLR3 siRNA sequence2 |                       | 5'<br>rUrCrUrUrArArArUrUrCrArGrGrUrArUrCr<br>UrCrArUrGrUrUrGrArA 3' |                                      |
| BBB RIGI siRNA sequence  | CD.Ri.2628<br>0.13.2  | 5'<br>rArGrCrUrUrCrUrArArArArCrCrUrGrAr<br>GrArUrArUrUGA 3'         | BBB RIGI - position<br>1972-1997     |
| BBB RIGI siRNA sequence2 |                       | 5'<br>rUrCrArArUrArUrCrUrCrArGrGrUrUrUrUr<br>ArGrArArArGrCrUrGrA 3' |                                      |
| BBB RIGI siRNA sequence  | CD.Ri.2628<br>0.13.10 | 5'<br>rGrUrGrGrCrArArCrArGrUrCrArArArGrAr<br>CrArArCrUrUGG 3'       | BBB RIGI - position<br>1312-1337     |
| BBB RIGI siRNA sequence2 |                       | 5'<br>rCrCrArArGrUrUrGrUrCrUrUrGrArCrUr<br>GrUrUrGrCrCrArCrCrA 3'   |                                      |
| BBB MDA5 siRNA sequence  | CD.Ri.2627<br>9.13.2  | 5'<br>rArCrUrUrGrGrArCrArArGrArArArArArAr<br>GrCrArUrCrUGA 3'       | BBB MDA5 -<br>position 1256-<br>1281 |
| BBB MDA5 siRNA sequence2 |                       | 5'<br>rUrCrArGrArUrGrCrUrUrUrUrUrCrUrUr<br>GrUrCrCrArArGrUrGrA 3'   |                                      |
| BBB MDA5 siRNA sequence  | CD.Ri.2627<br>9.13.1  | 5'<br>rGrArArGrArUrUrCrUrUrUrArArArArCr<br>ArUrUrGrUrCAA 3'         | BBB MDA5 -<br>position 3301-<br>3326 |
| BBB MDA5 siRNA           |                       | 5'                                                                  |                                      |

|           |  |                                                             |  |
|-----------|--|-------------------------------------------------------------|--|
| sequence2 |  | rUrUrGrArCrArArUrGrUrUrUrArArArAr<br>GrArArUrCrUrUrCrArA 3' |  |
|-----------|--|-------------------------------------------------------------|--|

104 **Supplementary Methods**

105 **c-Rel Western Blots:** HEK293T cells were seeded at a concentration of  $3 \times 10^5$   
106 cells/well in six well plates and simultaneously transfected with 100nM of 1:1  
107 cocktail of two different siRNA specific to c-Rel (table 1), NC siRNA or no siRNA  
108 and plasmids expressing HA-tagged c-Rel. Cells were harvested in sample buffer for  
109 western blots 24 hrs post transfections. Western blots were carried out as previously  
110 mentioned <sup>2</sup>. Primary antibodies used were: 1: 1,000 mouse anti-HA (Clone HA7;  
111 Sigma) and 1: 5,000 rabbit anti-GAPDH (Cedarlane). Secondary antibodies used  
112 were: 1:10,000 goat anti-mouse Alexa 488 (Molecular Probes) and 1: 10,000 goat  
113 anti-rabbit Cy5 (GE Healthcare).

114 **TLR3, RIGI and MDA5 knockdown:** Dicer-ready siRNA (DsiRNA) specific to big  
115 brown bat TLR3, RIGI and MDA5 were designed and obtained through Integrated  
116 DNA Technologies (IDT). A 100nM final concentration of a 1:1 mixture of two  
117 DsiRNAs (see Supplementary Table S5) targeting separate regions on the respective  
118 transcripts was transfected into Efk3 cells using Lipofectamine 2000. Scrambled non-  
119 specific DsiRNA (NC DsiRNA; IDT) was used as a negative control. Transfections  
120 were carried out as previously mentioned for siRNA <sup>3</sup>. In brief, cells were transfected  
121 with the siRNA cocktail for 24 hours and then transfected with 750ng/ml poly(I:C)  
122 using Lipofectamine 2000. RNA was extracted 16h after poly(I:C) stimulation for  
123 cDNA preparation and qRT-PCR.

124

125

126

127

128 **References:**

129 1 Zhang, G. *et al.* Comparative analysis of bat genomes provides insight into the  
130 evolution of flight and immunity. *Science* **339**, 456-460,  
131 doi:10.1126/science.1230835 (2013).

132 2 Bergeron, T. *et al.* The effect of Zhangfei on the unfolded protein response  
133 and growth of cells derived from canine and human osteosarcomas. *Vet Comp*  
134 *Oncol* **11**, 140-150, doi:10.1111/j.1476-5829.2011.00310.x (2013).

135 3 Nasirudeen, A. M. *et al.* RIG-I, MDA5 and TLR3 synergistically play an  
136 important role in restriction of dengue virus infection. *PLoS Negl Trop Dis* **5**,  
137 e926, doi:10.1371/journal.pntd.0000926 (2011).

138
